# Supplementary material
Source: PubMed Central journal article supplement (PMC4178837)
Supplement: JVI.00788-14_zjv999099462so1.pdf [file JVI.00788-14_zjv999099462so1.pdf]

1 **SUPPLEMENTARY MOVIE LEGENDS**

2

3 **Movie S1.** A stack of 2D FIB-SEM images of an 8-hour co-culture of HIV-1 infected and  
4 uninfected Jurkat cells shows a cluster of cells with multiple cell contact zones.

5

6 **Movie S2.** A stack of 2D FIB-SEM images of a 24-hour co-culture of HIV-1 IIIb-  
7 infected H9 cells and human fetal astrocytes reveals a synaptic region rich with HIV  
8 virions and membrane protrusions from both host and target cell.
